# Supplementary material for: Anti-Colorectal Cancer Effects of Probiotic-Derived p8 Protein
Source: MDPI journal article supplement (doi:10.3390/genes10080624), 2019-08-19
Supplement: s1 [file s1]

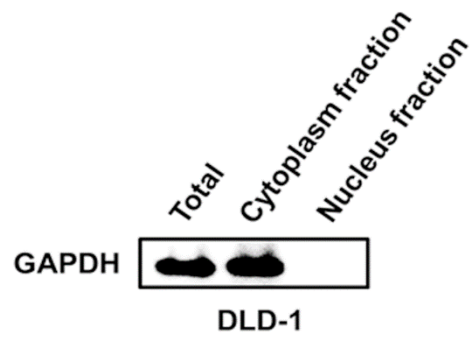

**Figure S1.** Verification of no cytoplasmic contamination in the isolated nuclear fraction. The cytoplasmic contamination in the isolated nuclear fraction was determined by western blotting [Lane 1: DLD-1 cell lysate (30  $\mu$ g), lane 2: cytoplasm fraction (30  $\mu$ g), lane 3: nuclear fraction (30  $\mu$ g)]. GAPDH was used as a cytoplasmic probe.

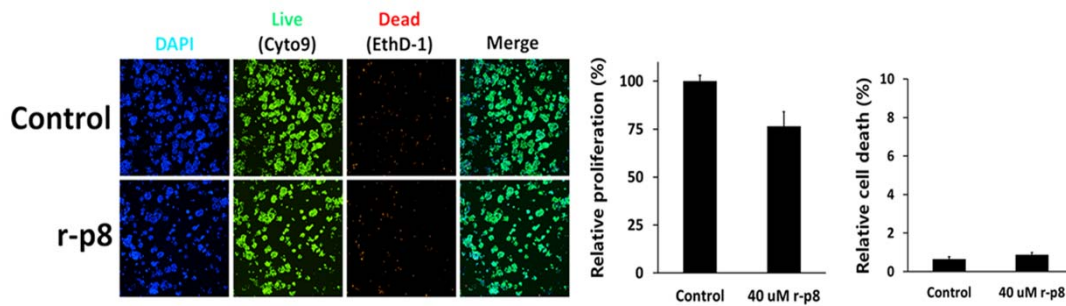

**Figure S2.** Apoptotic property of exogenous r-p8 treatment. R-p8 (40  $\mu$ M) was incubated with DLD-1 cells ( $3 \times 10^3$  cells/well) for 72 h, and both cells [control and r-p8 (40  $\mu$ M) treatment] were then stained with the Live/Dead cell markers Syto9 (Green)/EthD-1 (Red) or with the total cell marker Hoechst (Blue).
